# Supplementary material for: Techno-economic and environmental evaluation of producing chemicals and drop-in aviation biofuelsviaaqueous phase processing
Source: Royal Society of Chemistry journal article supplement (doi:10.1039/c7ee03557h), 2018-01-01
Supplement: c7ee03557h1.pdf [file c7ee03557h1.pdf]

## **Techno-economic and environmental evaluation of producing chemicals and drop-in aviation biofuels via aqueous phase processing**

H. Olcay, R. Malina, A. A. Upadhye, J. I. Hileman, G. W. Huber and S. R. H. Barrett

### **Supplementary Information\***

---

\* Refer to the manuscript for details and references.

**Table S1.** Net aggregated resource requirements to produce 1 MJ of hydrogen in the 12 hydrogen pathways described in the text, and the lifecycle emissions from its production. Negative values are due to co-product displacement. Simulation year: 2015.

| Resources               |                    | Hydrogen pathways |          |           |          |                      |          |          |          |          |          |          |          |
|-------------------------|--------------------|-------------------|----------|-----------|----------|----------------------|----------|----------|----------|----------|----------|----------|----------|
|                         |                    | 1                 | 2        | 3         | 4        | 5                    | 6        | 7        | 8        | 9        | 10       | 11       | 12       |
| Crude oil               | J                  | 4.66E+03          | 1.57E+04 | 6.53E+04  | 2.11E+04 | UOP LLC Confidential | 2.02E+04 | 1.21E+06 | 4.13E+04 | 7.26E+03 | 9.00E+02 | 2.16E+02 | 4.41E+04 |
| Natural gas             |                    | 1.49E+06          | 7.20E+04 | 6.59E+05  | 2.02E+06 |                      | 1.03E+04 | 1.52E+05 | 1.48E+05 | 1.40E+05 | 1.78E+04 | 4.57E+03 | 9.32E+05 |
| Coal                    |                    | 3.13E+04          | 1.35E+06 | 1.51E+05  | 1.33E+05 |                      | 1.97E+06 | 3.72E+04 | 5.04E+04 | 2.23E+05 | 2.96E+04 | 8.82E+03 | 1.80E+06 |
| Pet coke                |                    | 8.11E+00          | 2.73E+01 | 1.14E+02  | 3.67E+01 |                      | 3.51E+01 | 2.11E+03 | 7.19E+01 | 1.26E+01 | 1.57E+00 | 3.77E-01 | 7.68E+01 |
| Bitumen                 |                    | 7.03E+02          | 2.37E+03 | 9.85E+03  | 3.19E+03 |                      | 3.04E+03 | 1.83E+05 | 6.23E+03 | 1.10E+03 | 1.36E+02 | 3.26E+01 | 6.66E+03 |
| Shale oil               |                    | 1.07E+03          | 3.60E+03 | 1.50E+04  | 4.84E+03 |                      | 4.62E+03 | 2.78E+05 | 9.46E+03 | 1.66E+03 | 2.06E+02 | 4.96E+01 | 1.01E+04 |
| Nuclear energy          |                    | 5.53E+03          | 2.38E+04 | 1.67E+04  | 2.35E+04 |                      | 2.42E+03 | 6.68E+03 | 8.90E+03 | 1.04E+06 | 1.20E+06 | 1.56E+03 | 3.17E+05 |
| <i>Renewable energy</i> |                    |                   |          |           |          |                      |          |          |          |          |          |          |          |
| Hydroelectric           | J                  | 1.93E+03          | 8.31E+03 | 5.82E+03  | 8.18E+03 |                      | 8.44E+02 | 2.28E+03 | 3.10E+03 | 1.37E+04 | 1.82E+03 | 5.42E+02 | 1.11E+05 |
| Geothermal              |                    | 1.21E+02          | 5.20E+02 | 3.64E+02  | 5.12E+02 |                      | 5.28E+01 | 1.46E+02 | 1.94E+02 | 8.58E+02 | 1.14E+02 | 3.39E+01 | 6.92E+03 |
| Solar                   |                    | 1.61E+02          | 6.94E+02 | 4.87E+02  | 6.84E+02 |                      | 7.06E+01 | 1.95E+02 | 2.59E+02 | 1.15E+03 | 1.52E+02 | 1.39E+06 | 9.25E+03 |
| Wind                    |                    | 1.37E+03          | 5.92E+03 | 4.15E+03  | 5.83E+03 |                      | 6.02E+02 | 1.66E+03 | 2.21E+03 | 9.77E+03 | 1.30E+03 | 3.86E+02 | 7.88E+04 |
| Unspecified             |                    | 1.41E+02          | 6.09E+02 | 4.27E+02  | 6.00E+02 |                      | 6.19E+01 | 1.71E+02 | 2.27E+02 | 1.01E+03 | 1.33E+02 | 3.98E+01 | 8.11E+03 |
| <i>Biomass</i>          |                    |                   |          |           |          |                      |          |          |          |          |          |          |          |
| Forest residues         | J                  | 3.75E+02          | 1.62E+03 | 9.24E+02  | 1.59E+03 |                      | 1.64E+02 | 4.53E+02 | 6.04E+02 | 2.67E+03 | 3.54E+02 | 1.06E+02 | 2.15E+04 |
|                         | g                  | 1.87E-02          | 8.04E-02 | 4.59E-02  | 7.92E-02 |                      | 8.17E-03 | 2.25E-02 | 3.00E-02 | 1.33E-01 | 1.76E-02 | 5.25E-03 | 1.07E+00 |
| Switchgrass             | J                  | -                 | -        | -         | -        | -                    | -        | 2.38E+06 | -        | -        | -        | -        |          |
|                         | g                  | -                 | -        | -         | -        | -                    | -        | 1.42E+02 | -        | -        | -        | -        |          |
| Corn                    | J                  | -                 | -        | 1.99E+06  | -        | -                    | -        | -        | -        | -        | -        | -        |          |
|                         | g                  | -                 | -        | 1.25E+02  | -        | -                    | -        | -        | -        | -        | -        | -        |          |
| Soybean                 | J                  | -                 | -        | -2.44E+05 | -        | -                    | -        | -        | -        | -        | -        | -        |          |
|                         | g                  | -                 | -        | -1.32E+01 | -        | -                    | -        | -        | -        | -        | -        | -        |          |
| Sugarcane               | J                  | -                 | -        | 4.01E+01  | -        | -                    | -        | -        | -        | -        | -        | -        |          |
|                         | g                  | -                 | -        | 1.10E-02  | -        | -                    | -        | -        | -        | -        | -        | -        |          |
| Water                   | cm <sup>3</sup>    | 1.50E+02          | 1.42E+02 | 2.44E+03  | 1.66E+02 | 2.55E+02             | 4.21E+02 | 2.10E+02 | 3.46E+02 | 3.53E+02 | 9.18E+00 | 2.09E+03 |          |
| Lifecycle emissions     | gCO <sub>2</sub> e | 92.4              | 41.7     | 18.2      | 135.2    | 0.11                 | 178.0    | 182.5    | 29.8     | 31.4     | 4.1      | 1.2      | 239.0    |

**Table S2.** Chemical Engineering Plant Cost Index (CEPCI)

|            | <b>2010</b> | <b>2011</b> | <b>2012</b> | <b>2013</b> | <b>2014</b> | <b>2015</b> |
|------------|-------------|-------------|-------------|-------------|-------------|-------------|
| <b>Jan</b> | 532.9       | 564.8       | 593.6       | 571.2       | 572.8       | 573.1       |
| <b>Feb</b> | 539.1       | 574.6       | 596.3       | 569.9       | 574.9       | 570.5       |
| <b>Mar</b> | 541.8       | 575.9       | 596.1       | 568.3       | 571.5       | 568.6       |
| <b>Apr</b> | 555.3       | 582.3       | 595.9       | 569.4       | 573.6       | 562.9       |
| <b>May</b> | 558.2       | 581.9       | 593.8       | 566.5       | 574.3       | 560.5       |
| <b>Jun</b> | 556.4       | 588.9       | 585.6       | 564.8       | 576.2       | 558.3       |
| <b>Jul</b> | 550.7       | 593.2       | 582.2       | 564         | 576.9       | 556.3       |
| <b>Aug</b> | 549.5       | 596.1       | 576.6       | 564.8       | 578.7       | 553.9       |
| <b>Sep</b> | 552.5       | 596         | 577.4       | 567.3       | 580.1       | 550.3       |
| <b>Oct</b> | 556.3       | 594         | 575.4       | 567.5       | 579.7       | 547.2       |
| <b>Nov</b> | 556.7       | 590.8       | 570.6       | 566.6       | 578.4       | 542.8       |
| <b>Dec</b> | 560.3       | 590.1       | 571.9       | 567.5       | 575.7       | 537.1       |
| <b>Ave</b> | 550.8       | 585.7       | 584.6       | 567.3       | 576.1       | 556.8       |

**Table S3.** Acetone prices that this study relies on, \$/t.

|            | <b>2010</b> | <b>2011</b> | <b>2012</b> | <b>2013</b> | <b>2014</b> | <b>2015</b> |
|------------|-------------|-------------|-------------|-------------|-------------|-------------|
| <b>Jan</b> | 1257        | 1411        | 1780        | 1618        | 1786        | 1389        |
| <b>Feb</b> | 1301        | 1543        | 1548        | 1755        | 1830        | 1213        |
| <b>Mar</b> | 1301        | 1587        | 1748        | 1667        | 1720        | 1146        |
| <b>Apr</b> | 1345        | 1830        | 1691        | 1459        | 1676        | 1036        |
| <b>May</b> | 1213        | 1764        | 1519        | 1457        | 1609        | 970         |
| <b>Jun</b> | 1146        | 1609        | 1433        | 1565        | 1504        | 970         |
| <b>Jul</b> | 1124        | 1499        | 1204        | 1565        | 1552        | 992         |
| <b>Aug</b> | 1014        | 1477        | 1232        | 1653        | 1609        | 926         |
| <b>Sep</b> | 1014        | 1411        | 1261        | 1653        | 1609        | 794         |
| <b>Oct</b> | 1080        | 1279        | 1290        | 1587        | 1786        | 750         |
| <b>Nov</b> | 1036        | 1124        | 1407        | 1521        | 1653        | 794         |
| <b>Dec</b> | 1080        | 1124        | 1506        | 1631        | 1587        | 794         |
| <b>Ave</b> | 1159        | 1472        | 1468        | 1594        | 1660        | 981         |

**Table S4.** Electricity prices that this study relies on, ¢/kWh.

|            | <b>2010</b> | <b>2011</b> | <b>2012</b> | <b>2013</b> | <b>2014</b> | <b>2015</b> |
|------------|-------------|-------------|-------------|-------------|-------------|-------------|
| <b>Jan</b> | 6.5         | 6.53        | 6.44        | 6.5         | 6.98        | 6.63        |
| <b>Feb</b> | 6.55        | 6.63        | 6.45        | 6.66        | 7.12        | 6.9         |
| <b>Mar</b> | 6.53        | 6.53        | 6.46        | 6.64        | 6.99        | 6.81        |
| <b>Apr</b> | 6.55        | 6.53        | 6.38        | 6.58        | 6.77        | 6.6         |
| <b>May</b> | 6.64        | 6.68        | 6.53        | 6.75        | 6.83        | 6.71        |
| <b>Jun</b> | 6.96        | 7.14        | 6.89        | 7.25        | 7.39        | 7.1         |
| <b>Jul</b> | 7.23        | 7.31        | 7.13        | 7.45        | 7.62        | 7.44        |
| <b>Aug</b> | 7.22        | 7.4         | 7.08        | 7.37        | 7.51        | 7.32        |
| <b>Sep</b> | 7           | 7.15        | 6.97        | 7.22        | 7.37        | 7.18        |
| <b>Oct</b> | 6.8         | 6.77        | 6.62        | 6.87        | 7.07        | 6.88        |
| <b>Nov</b> | 6.56        | 6.53        | 6.5         | 6.65        | 6.75        | 6.62        |
| <b>Dec</b> | 6.6         | 6.51        | 6.52        | 6.66        | 6.7         | 6.42        |
| <b>Ave</b> | 6.76        | 6.81        | 6.66        | 6.88        | 7.09        | 6.88        |

**Table S5.** Hydrochloric acid prices that this study relies on, \$/t.

|            | <b>2010</b> | <b>2011</b> | <b>2012</b> | <b>2013</b> | <b>2014</b> | <b>2015</b> |
|------------|-------------|-------------|-------------|-------------|-------------|-------------|
| <b>Jan</b> | 151         | 130         | 265         | 232         | 215         | 224         |
| <b>Feb</b> | 142         | 130         | 265         | 212         | 207         | 214         |
| <b>Mar</b> | 140         | 127         | 265         | 211         | 171         | 153         |
| <b>Apr</b> | 140         | 113         | 265         | 208         | 160         | 107         |
| <b>May</b> | 140         | 113         | 264         | 208         | 135         | 98          |
| <b>Jun</b> | 140         | 113         | 264         | 208         | 150         | 94          |
| <b>Jul</b> | 140         | 113         | 263         | 206         | 176         | 91          |
| <b>Aug</b> | 140         | 143         | 254         | 226         | 187         | 80          |
| <b>Sep</b> | 137         | 153         | 255         | 226         | 220         | 80          |
| <b>Oct</b> | 136         | 170         | 264         | 226         | 242         | 77          |
| <b>Nov</b> | 131         | 265         | 264         | 226         | 251         | 61          |
| <b>Dec</b> | 130         | 265         | 256         | 215         | 245         | 61          |
| <b>Ave</b> | 139         | 153         | 262         | 217         | 197         | 112         |

**Table S6.** Ruthenium prices, \$/kg

|            | <b>2010</b> | <b>2011</b> | <b>2012</b> | <b>2013</b> | <b>2014</b> | <b>2015</b> |
|------------|-------------|-------------|-------------|-------------|-------------|-------------|
| <b>Jan</b> | 5433        | 5787        | 3567        | 2755        | 1866        | 1810        |
| <b>Feb</b> | 5892        | 5787        | 4088        | 2733        | 2045        | 1800        |
| <b>Mar</b> | 6109        | 5787        | 4070        | 2733        | 2185        | 1774        |
| <b>Apr</b> | 6720        | 5787        | 3714        | 2733        | 2315        | 1608        |
| <b>May</b> | 7831        | 5787        | 3697        | 2733        | 2315        | 1608        |
| <b>Jun</b> | 7745        | 5787        | 3697        | 2733        | 2254        | 1571        |
| <b>Jul</b> | 6766        | 5787        | 3697        | 2699        | 2189        | 1426        |
| <b>Aug</b> | 6350        | 5647        | 3613        | 2479        | 2180        | 1350        |
| <b>Sep</b> | 6079        | 5393        | 3537        | 2013        | 2046        | 1350        |
| <b>Oct</b> | 5718        | 4731        | 3537        | 1833        | 1894        | 1350        |
| <b>Nov</b> | 5626        | 4114        | 3171        | 1833        | 1865        | 1350        |
| <b>Dec</b> | 5773        | 3601        | 2894        | 1833        | 1865        | 1350        |
| <b>Ave</b> | 6337        | 5333        | 3607        | 2426        | 2085        | 1529        |

**Table S7.** Platinum prices, \$/kg

|            | <b>2010</b> | <b>2011</b> | <b>2012</b> | <b>2013</b> | <b>2014</b> | <b>2015</b> |
|------------|-------------|-------------|-------------|-------------|-------------|-------------|
| <b>Jan</b> | 50467       | 57521       | 48529       | 52944       | 45900       | 40201       |
| <b>Feb</b> | 49041       | 58903       | 53398       | 53983       | 45448       | 38811       |
| <b>Mar</b> | 51498       | 56912       | 53518       | 51023       | 46870       | 36893       |
| <b>Apr</b> | 55315       | 57827       | 51197       | 47980       | 46241       | 37305       |
| <b>May</b> | 52606       | 57610       | 47438       | 47727       | 46988       | 36965       |
| <b>Jun</b> | 50148       | 57124       | 46603       | 46154       | 46908       | 35234       |
| <b>Jul</b> | 49113       | 56644       | 45961       | 45169       | 48125       | 32833       |
| <b>Aug</b> | 49639       | 58201       | 46857       | 48191       | 46786       | 31882       |
| <b>Sep</b> | 51263       | 56458       | 52116       | 47131       | 44036       | 31385       |
| <b>Oct</b> | 54460       | 49474       | 52737       | 45580       | 40740       | 31559       |
| <b>Nov</b> | 54587       | 51428       | 50759       | 45821       | 39127       | 28815       |
| <b>Dec</b> | 55247       | 47210       | 51192       | 43727       | 39391       | 27824       |
| <b>Ave</b> | 51949       | 55443       | 50026       | 47952       | 44713       | 34142       |

**Table S8.** Acetic acid prices that this study relies on, \$/t.

|            | <b>2010</b> | <b>2011</b> | <b>2012</b> | <b>2013</b> | <b>2014</b> | <b>2015</b> |
|------------|-------------|-------------|-------------|-------------|-------------|-------------|
| <b>Jan</b> | 513         | 650         | 562         | 607         | 725         | 713         |
| <b>Feb</b> | 513         | 650         | 590         | 627         | 726         | 700         |
| <b>Mar</b> | 537         | 650         | 597         | 682         | 726         | 700         |
| <b>Apr</b> | 537         | 651         | 572         | 695         | 739         | 700         |
| <b>May</b> | 537         | 676         | 572         | 659         | 723         | 700         |
| <b>Jun</b> | 537         | 625         | 572         | 685         | 733         | 700         |
| <b>Jul</b> | 537         | 635         | 572         | 648         | 733         | 700         |
| <b>Aug</b> | 537         | 650         | 645         | 667         | 722         | 700         |
| <b>Sep</b> | 537         | 650         | 665         | 667         | 703         | 687         |
| <b>Oct</b> | 537         | 630         | 608         | 667         | 713         | 687         |
| <b>Nov</b> | 537         | 625         | 607         | 708         | 713         | 687         |
| <b>Dec</b> | 563         | 625         | 607         | 725         | 713         | 687         |
| <b>Ave</b> | 535         | 643         | 597         | 670         | 722         | 697         |

**Table S9.** Furfural and hydroxymethylfurfural prices that this study relies on, \$/t.

|            | <b>2010</b> | <b>2011</b> | <b>2012</b> | <b>2013</b> | <b>2014</b> | <b>2015</b> |
|------------|-------------|-------------|-------------|-------------|-------------|-------------|
| <b>Jan</b> | 1237        | 2655        | 1982        | 1380        | 1627        | 1639        |
| <b>Feb</b> | 1377        | 2778        | 1737        | 1314        | 1774        | 1550        |
| <b>Mar</b> | 1411        | 2610        | 1783        | 1354        | 1634        | 1571        |
| <b>Apr</b> | 1432        | 2698        | 1869        | 1564        | 1583        | 1637        |
| <b>May</b> | 1739        | 2558        | 1793        | 1404        | 1481        | 1488        |
| <b>Jun</b> | 1446        | 2539        | 1587        | 1484        | 1399        | 1485        |
| <b>Jul</b> | 1791        | 2817        | 1494        | 1402        | 1438        | 1538        |
| <b>Aug</b> | 1551        | 2366        | 1462        | 1300        | 1568        | 1734        |
| <b>Sep</b> | 1615        | 2188        | 1398        | 1466        | 1343        | 1487        |
| <b>Oct</b> | 1633        | 2151        | 1657        | 1492        | 1269        | 1528        |
| <b>Nov</b> | 2195        | 2006        | 1874        | 1600        | 1621        | 1404        |
| <b>Dec</b> | 2532        | 1975        | 2101        | 1572        | 1670        | 1828        |
| <b>Ave</b> | 1663        | 2445        | 1728        | 1444        | 1534        | 1574        |

**Table S10.** Natural gas prices that this study relies on, \$/mmBtu.

|            | <b>2010</b> | <b>2011</b> | <b>2012</b> | <b>2013</b> | <b>2014</b> | <b>2015</b> |
|------------|-------------|-------------|-------------|-------------|-------------|-------------|
| <b>Jan</b> | 5.84        | 4.49        | 2.67        | 3.33        | 4.7         | 2.97        |
| <b>Feb</b> | 5.32        | 4.09        | 2.53        | 3.33        | 5.98        | 2.85        |
| <b>Mar</b> | 4.29        | 3.97        | 2.16        | 3.8         | 4.88        | 2.80        |
| <b>Apr</b> | 4.04        | 4.24        | 1.95        | 4.17        | 4.63        | 2.58        |
| <b>May</b> | 4.15        | 4.31        | 2.43        | 4.04        | 4.56        | 2.84        |
| <b>Jun</b> | 4.8         | 4.54        | 2.45        | 3.83        | 4.57        | 2.77        |
| <b>Jul</b> | 4.63        | 4.42        | 2.96        | 3.62        | 4.01        | 2.83        |
| <b>Aug</b> | 4.31        | 4.05        | 2.84        | 3.43        | 3.89        | 2.76        |
| <b>Sep</b> | 3.89        | 3.89        | 2.85        | 3.62        | 3.92        | 2.65        |
| <b>Oct</b> | 3.43        | 3.56        | 3.32        | 3.67        | 3.77        | 2.32        |
| <b>Nov</b> | 3.71        | 3.26        | 3.54        | 3.62        | 4.1         | 2.08        |
| <b>Dec</b> | 4.25        | 3.16        | 3.34        | 4.24        | 3.43        | 1.92        |
| <b>Ave</b> | 4.39        | 4           | 2.75        | 3.73        | 4.37        | 2.61        |

**Table S11.** Propane prices that this study relies on, \$/gal.

|            | <b>2010</b> | <b>2011</b> | <b>2012</b> | <b>2013</b> | <b>2014</b> | <b>2015</b> |
|------------|-------------|-------------|-------------|-------------|-------------|-------------|
| <b>Jan</b> | 1.31        | 1.35        | 1.29        | 0.84        | 1.4         | 0.48        |
| <b>Feb</b> | 1.28        | 1.38        | 1.22        | 0.86        | 1.44        | 0.57        |
| <b>Mar</b> | 1.14        | 1.4         | 1.26        | 0.89        | 1.06        | 0.54        |
| <b>Apr</b> | 1.14        | 1.45        | 1.2         | 0.94        | 1.1         | 0.55        |
| <b>May</b> | 1.08        | 1.52        | 0.95        | 0.93        | 1.04        | 0.47        |
| <b>Jun</b> | 1.04        | 1.52        | 0.79        | 0.86        | 1.05        | 0.39        |
| <b>Jul</b> | 1.01        | 1.53        | 0.88        | 0.92        | 1.04        | 0.41        |
| <b>Aug</b> | 1.07        | 1.53        | 0.9         | 1.06        | 1.02        | 0.37        |
| <b>Sep</b> | 1.13        | 1.56        | 0.91        | 1.11        | 1.06        | 0.45        |
| <b>Oct</b> | 1.23        | 1.47        | 0.96        | 1.14        | 0.94        | 0.45        |
| <b>Nov</b> | 1.25        | 1.46        | 0.89        | 1.18        | 0.8         | 0.43        |
| <b>Dec</b> | 1.3         | 1.4         | 0.8         | 1.28        | 0.56        | 0.39        |
| <b>Ave</b> | 1.17        | 1.46        | 1           | 1           | 1.04        | 0.46        |

**Table S12.** Naphtha prices that this study relies on, \$/gal.

|            | <b>2010</b> | <b>2011</b> | <b>2012</b> | <b>2013</b> | <b>2014</b> | <b>2015</b> |
|------------|-------------|-------------|-------------|-------------|-------------|-------------|
| <b>Jan</b> | 1.88        | 2.36        | 2.75        | 2.86        | 2.68        | 1.32        |
| <b>Feb</b> | 1.93        | 2.52        | 2.93        | 3.16        | 2.61        | 1.58        |
| <b>Mar</b> | 2.05        | 2.83        | 3.01        | 2.97        | 2.63        | 1.56        |
| <b>Apr</b> | 2.13        | 3.03        | 2.88        | 2.43        | 2.66        | 1.59        |
| <b>May</b> | 1.95        | 2.88        | 2.66        | 2.35        | 2.68        | 1.74        |
| <b>Jun</b> | 1.96        | 2.69        | 2.38        | 2.24        | 2.76        | 1.73        |
| <b>Jul</b> | 1.91        | 2.83        | 2.45        | 2.61        | 2.64        | 1.37        |
| <b>Aug</b> | 1.86        | 2.7         | 2.86        | 2.6         | 2.5         | 1.2         |
| <b>Sep</b> | 1.93        | 2.61        | 2.97        | 2.57        | 2.41        | 1.24        |
| <b>Oct</b> | 2.06        | 2.62        | 2.78        | 2.54        | 2.02        | 1.25        |
| <b>Nov</b> | 2.12        | 2.5         | 2.78        | 2.51        | 1.83        | 1.26        |
| <b>Dec</b> | 2.29        | 2.56        | 2.83        | 2.74        | 1.32        | 1.12        |
| <b>Ave</b> | 2.01        | 2.68        | 2.77        | 2.63        | 2.4         | 1.41        |

**Table S13.** Jet fuel prices that this study relies on, \$/gal.

|            | <b>2010</b> | <b>2011</b> | <b>2012</b> | <b>2013</b> | <b>2014</b> | <b>2015</b> |
|------------|-------------|-------------|-------------|-------------|-------------|-------------|
| <b>Jan</b> | 2.05        | 2.62        | 3.09        | 3.09        | 2.92        | 1.5         |
| <b>Feb</b> | 1.99        | 2.84        | 3.21        | 3.22        | 2.97        | 1.76        |
| <b>Mar</b> | 2.11        | 3.13        | 3.26        | 2.97        | 2.89        | 1.63        |
| <b>Apr</b> | 2.24        | 3.27        | 3.23        | 2.81        | 2.89        | 1.7         |
| <b>May</b> | 2.06        | 3.09        | 2.97        | 2.73        | 2.87        | 1.85        |
| <b>Jun</b> | 2.06        | 3.05        | 2.68        | 2.77        | 2.88        | 1.73        |
| <b>Jul</b> | 2.02        | 3.13        | 2.89        | 2.89        | 2.82        | 1.54        |
| <b>Aug</b> | 2.08        | 3.01        | 3.16        | 3           | 2.84        | 1.39        |
| <b>Sep</b> | 2.11        | 2.95        | 3.19        | 2.93        | 2.73        | 1.39        |
| <b>Oct</b> | 2.25        | 2.97        | 3.11        | 2.89        | 2.46        | 1.39        |
| <b>Nov</b> | 2.32        | 3.05        | 2.96        | 2.83        | 2.3         | 1.33        |
| <b>Dec</b> | 2.45        | 2.87        | 2.94        | 2.96        | 1.8         | 1.08        |
| <b>Ave</b> | 2.15        | 3           | 3.06        | 2.92        | 2.7         | 1.52        |



**Table S14.** Diesel fuel prices that this study relies on, \$/gal.

|            | <b>2010</b> | <b>2011</b> | <b>2012</b> | <b>2013</b> | <b>2014</b> | <b>2015</b> |
|------------|-------------|-------------|-------------|-------------|-------------|-------------|
| <b>Jan</b> | 2.07        | 2.64        | 3.08        | 3.1         | 3.12        | 1.68        |
| <b>Feb</b> | 2.04        | 2.84        | 3.22        | 3.24        | 3.23        | 1.99        |
| <b>Mar</b> | 2.16        | 3.13        | 3.3         | 3.04        | 2.99        | 1.86        |
| <b>Apr</b> | 2.28        | 3.27        | 3.24        | 2.9         | 2.96        | 1.84        |
| <b>May</b> | 2.14        | 3.04        | 2.99        | 2.89        | 2.94        | 1.97        |
| <b>Jun</b> | 2.11        | 3.05        | 2.71        | 2.89        | 2.96        | 1.89        |
| <b>Jul</b> | 2.07        | 3.17        | 2.92        | 3.02        | 2.88        | 1.68        |
| <b>Aug</b> | 2.12        | 3.01        | 3.18        | 3.07        | 2.85        | 1.52        |
| <b>Sep</b> | 2.18        | 2.98        | 3.23        | 3.05        | 2.74        | 1.51        |
| <b>Oct</b> | 2.3         | 3.01        | 3.24        | 3           | 2.53        | 1.47        |
| <b>Nov</b> | 2.38        | 3.1         | 3.18        | 2.94        | 2.43        | 1.41        |
| <b>Dec</b> | 2.5         | 2.94        | 3.07        | 3.05        | 2.03        | 1.14        |
| <b>Ave</b> | 2.2         | 3.02        | 3.11        | 3.02        | 2.81        | 1.66        |

















**Table S22.** Representative red maple wood composition adjusted based on Zhang et al. 2013. Uronic acids are assumed to be the only extractives (Jara 2010). Moisture content is assumed to be 7.3%.

| <b>Dry composition</b> | <b>%</b> |
|------------------------|----------|
| Cellulose (glucan)     | 44.1     |
| Hemicellulose (xylan)  | 18.7     |
| Lignin                 | 24.8     |
| Soluble lignin         | 2.1      |
| Acetate                | 5.2      |
| Uronic acids           | 2.8      |
| Ash                    | 2.3      |
| Total                  | 100.0    |

**Table S23.** Pretreatment reactor material inputs based on 100 a.u. of dry red maple wood, reactions, reactor conditions and yields for different pretreatment techniques.

|                        |                                             | Pretreatment techniques |               |                    |               |
|------------------------|---------------------------------------------|-------------------------|---------------|--------------------|---------------|
|                        |                                             | Hot water               | Oxalic acid   | Hydro-chloric acid | Sulfuric acid |
|                        |                                             | Biorefinery model       |               |                    |               |
|                        |                                             | 1-4                     | 5             | 6                  | 7             |
| Material inputs, a.u.  | Dry biomass                                 | 100                     | 100           | 100                | 100           |
|                        | Moisture in biomass                         | 7.9                     | 7.9           | 7.9                | 7.9           |
|                        | Additional water                            | 124.6                   | 124.0         | 124.0              | 124.0         |
|                        | Acid                                        | -                       | 0.7           | 0.7                | 0.7           |
| Reactor conditions     | Temperature, °C                             | 200                     | 160           | 140                | 160           |
|                        | Pressure, psi (kPa)                         | 235<br>(1620)           | 235<br>(1620) | 235<br>(1620)      | 235<br>(1620) |
|                        | Residence time, min                         | 11.2                    | 27.5          | 51                 | 27.5          |
| Reactions and % yields | Cellulose → Glucooligomers                  | 6.2                     | 3             | 15.4               | 8.9           |
|                        | Glucooligomers + H <sub>2</sub> O → Glucose | 100.0                   | 100.0         | 100.0              | 100.0         |
|                        | Glucose → HMF + 3 H <sub>2</sub> O          | 41.7                    | 29.6          | 23.3               | 30.4          |
|                        | Xylan → Xylooligomers                       | 87.1                    | 92.5          | 94.4               | 91.0          |
|                        | Xylooligomers + H <sub>2</sub> O → Xylose   | 21.9                    | 85.5          | 81.9               | 93.9          |
|                        | Xylose → Furfural + 3 H <sub>2</sub> O      | 30.1                    | 8.0           | 14.4               | 9.2           |
|                        | Acetate → Acetic acid                       | 100.0                   | 100.0         | 100.0              | 100.0         |

**Table S24.** Cellulose deconstruction reactions and percent reaction yields for low and high yield cases. All reactions take place under 200°C and 230 psi (1586 kPa) at a residence time of 1 hour.

|                                                           | <b>Low<br/>yield</b> | <b>High<br/>yield</b> |
|-----------------------------------------------------------|----------------------|-----------------------|
| Biorefinery model                                         | 3                    | Others                |
| Cellulose → Glucooligomers                                | 100.0                | 100.0                 |
| Glucooligomers + H <sub>2</sub> O → Glucose               | 100.0                | 100.0                 |
| Glucose → Levulinic acid + Formic acid + H <sub>2</sub> O | 55.0                 | 75.0                  |
| Glucose → C <sub>6</sub> Humins                           | 45.0                 | 25.0                  |

**Table S25.** Percent conversion and molar selectivities derived from experimental data (Xing et al. 2010) to be applied in the hydrodeoxygenation reactor for the low and high yield cases.

**% Molar selectivity of alkanes based on carbon number**

| C <sub>1</sub> | C <sub>2</sub> | C <sub>3</sub> | C <sub>4</sub> | C <sub>5</sub> | C <sub>6</sub> | C <sub>7</sub> | C <sub>8</sub> | C <sub>9</sub> | C <sub>10</sub> | C <sub>11</sub> | C <sub>12</sub> | C <sub>13</sub> |
|----------------|----------------|----------------|----------------|----------------|----------------|----------------|----------------|----------------|-----------------|-----------------|-----------------|-----------------|
| 15.7           | 0.10           | 1.90           | 7.40           | 0.22           | 1.58           | 1.11           | 0.44           | 0.85           | 0.75            | 1.08            | 13.0            | 55.9            |

**% Conversion**

| Low yield | High yield |
|-----------|------------|
| 91        | 95         |

**Table S26.** Lifecycle production emissions of biorefinery products in gCO<sub>2e</sub>/kg for chemicals and gCO<sub>2e</sub>/MJ for fuels compared with their conventional counterparts.

| Products    | Conv.               | Biorefineries |      |      |      |      |      |      |
|-------------|---------------------|---------------|------|------|------|------|------|------|
|             |                     | 1             | 2    | 3    | 4    | 5    | 6    | 7    |
| Acetic acid | 620 <sup>a,d</sup>  | 267           | 272  | 281  | 92.4 | 276  | 262  | 267  |
| HMF         |                     | 416           | 425  | 439  | 144  | 430  | 410  | 416  |
| Furfural    |                     | N/A           | N/A  | N/A  | 160  | N/A  | N/A  | N/A  |
| Natural gas | 17.5 <sup>b,d</sup> | 49.3          | 48.4 | 53.5 | N/A  | 51.4 | 47.9 | 47.1 |
| Propane     |                     | 49.2          | 48.3 | 53.5 | N/A  | 51.4 | 47.8 | 47.1 |
| Naphtha     | 16.9 <sup>c,d</sup> | 50.3          | 49.4 | 54.4 | 37.2 | 52.5 | 48.8 | 48.1 |
| Jet fuel    | 13.5 <sup>c,e</sup> | 53.6          | 52.8 | 58.0 | 38.2 | 55.9 | 52.1 | 51.5 |
| Diesel      | 18.0 <sup>c,d</sup> | 49.8          | 48.9 | 54.0 | 36.7 | 52.0 | 48.3 | 47.7 |

<sup>a</sup>Acetic acid production from methanol carboxylation.

<sup>b</sup>Natural gas from shale and crude oil.

<sup>c</sup>Product from crude oil refining.

<sup>d</sup>Data from GREET.net.

<sup>e</sup>Data from Stratton et al. 2010.

**Table S27.** Cost of hydrogen in 2010 USD/kg based on the Hydrogen Analysis (H2A) carried out by the U.S. Department of Energy. A large-scale central plant is assumed unless noted otherwise. Start of production is assumed to take place in 2010. Plant sizes (kg/day) have been rounded. CCS: Carbon capture and storage.

| <b>Feedstock/Utility</b> | <b>Technology</b>        | <b>Plant size</b> | <b>Notes</b>                  | <b>H<sub>2</sub> cost</b> |
|--------------------------|--------------------------|-------------------|-------------------------------|---------------------------|
| Natural gas              | Steam reforming          | 380,000           | -                             | 1.78                      |
|                          |                          | 380,000           | With CCS                      | 2.19                      |
|                          |                          | 380,000           | Improved efficiency           | 1.69                      |
|                          |                          | 380,000           | With CCS, improved efficiency | 2.11                      |
|                          |                          | 1,500             | Small-scale distributed plant | 4.46                      |
| Biomass, hybrid poplar   | Gasification             | 150,000           | -                             | 2.39                      |
|                          |                          | 150,000           | Improved efficiency           | 2.16                      |
| Coal                     | Gasification             | 300,000           | -                             | 1.41                      |
|                          |                          | 300,000           | With CCS                      | 2.05                      |
|                          |                          | 250,000           | Improved efficiency           | 1.43                      |
|                          |                          | 250,000           | With CCS, improved efficiency | 1.97                      |
| Water/Grid electricity   | PEM electrolysis         | 50,000            | -                             | 5.37                      |
|                          |                          | 50,000            | With future efficiency        | 4.04                      |
|                          | Solid oxide electrolysis | 50,000            | -                             | 5.04                      |
|                          |                          | 50,000            | With improved efficiency      | 3.72                      |
|                          | Photoelectrochemical     | 50,000            | Technology option 1           | 4.82                      |
|                          |                          | 50,000            | Technology option 2           | 5.99                      |
| Water/Solar energy       | Thermolysis              | 100,000           | -                             | 4.03                      |

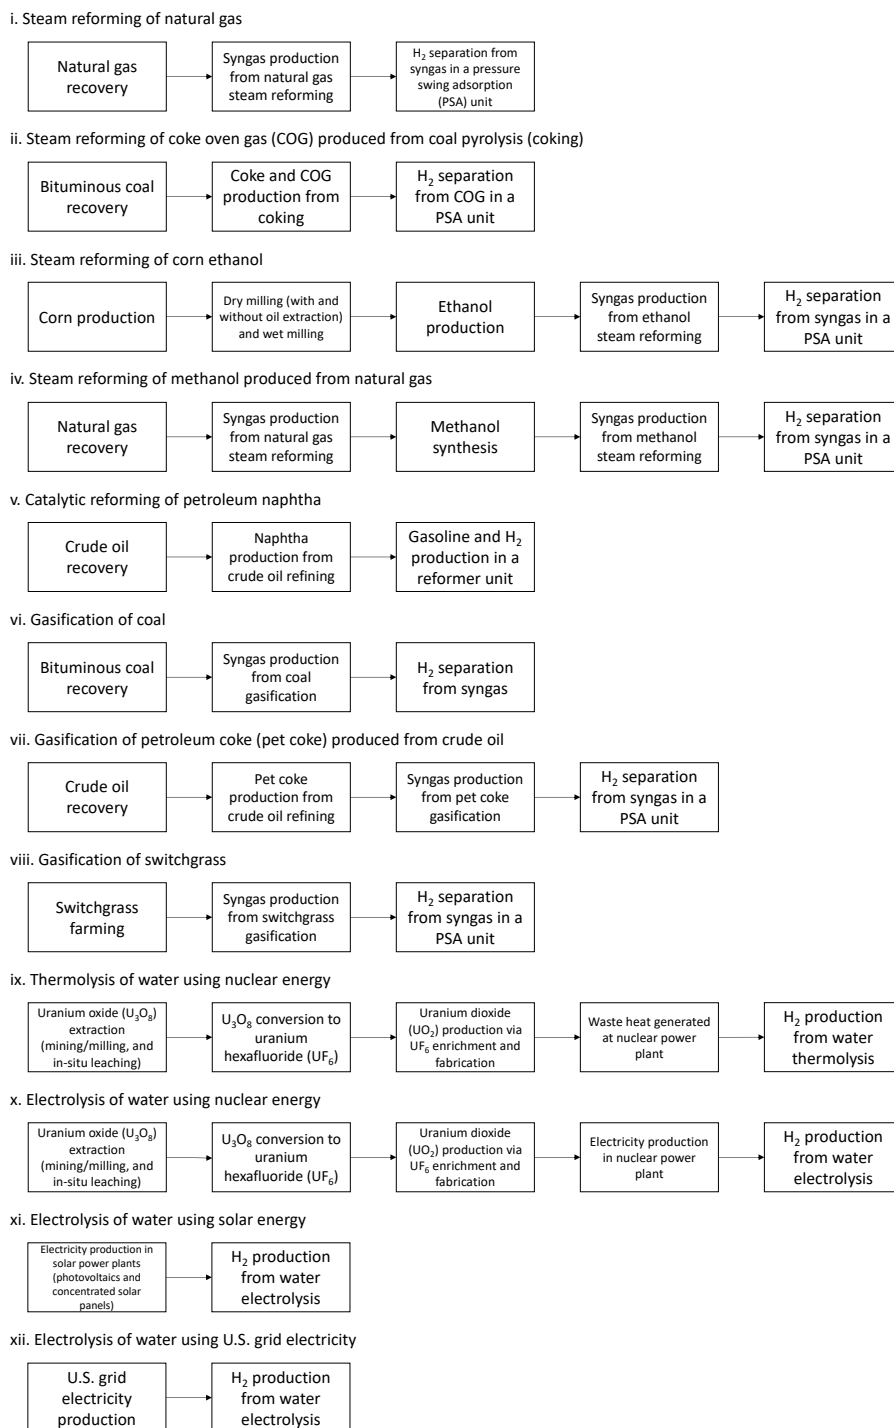

**Figure S1.** Process overview of the 12 hydrogen pathways employed in the lifecycle analysis calculations. Note that many lifecycle steps have been omitted for simplicity (e.g. transportation steps, water gas shift reaction, etc.).

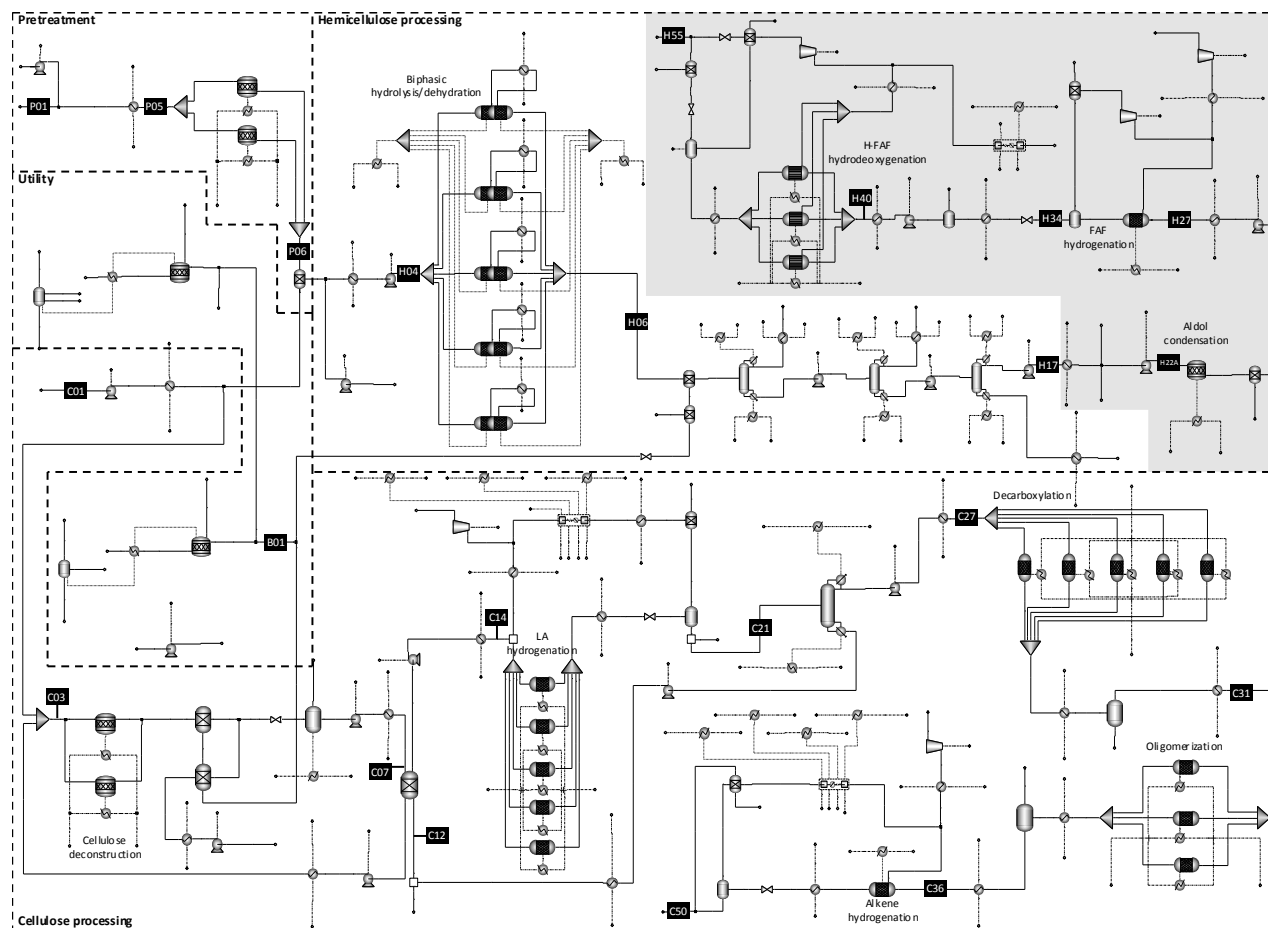

**Figure S2.** Aspen Plus® process flow diagram (PFD) of a single train outlining the four processing sections (pretreatment, cellulose processing, hemicellulose processing, utility) and the reactors. Unit operations in the shaded area do not exist in Biorefinery 4. Details of the streams shown are given for each Biorefinery model from Table S15 to Table S21. Recycle of streams utilized via calculator blocks are not visible in this PFD.

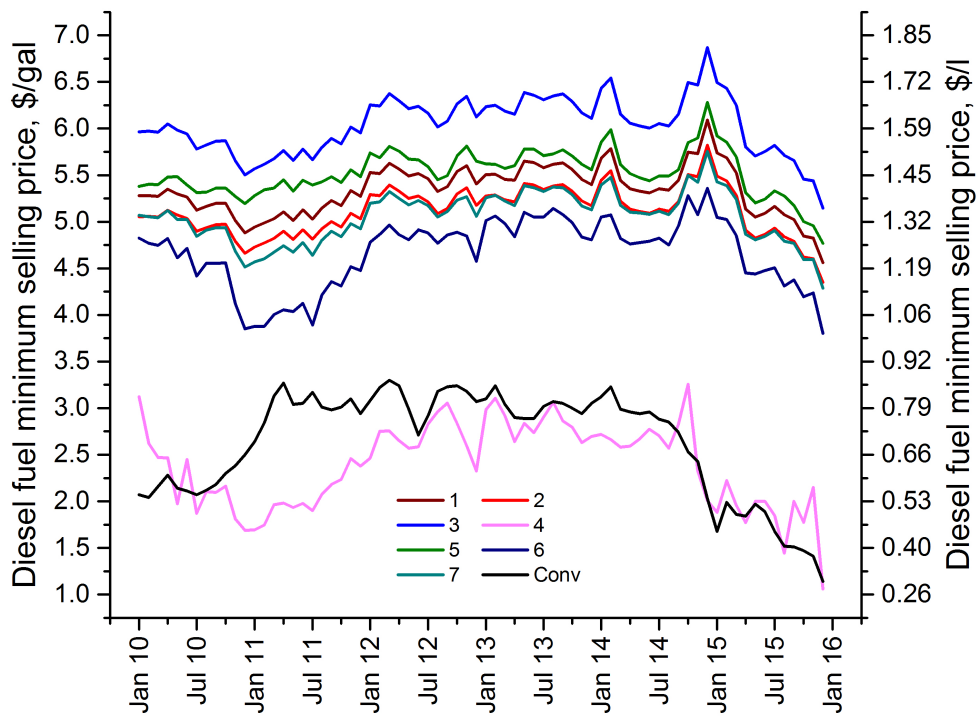

**Figure S3.** Minimum selling prices (MSP) of diesel fuels from the biorefinery models under consideration for the time period from January 2010-December 2015. Also shown are the conventional diesel fuel prices for comparison purposes.
